# Supplementary material
Source: MDPI journal article supplement (https://www.mdpi.com/2073-4344/11/12/1464)
Supplement: s1 [file s1]

# Synthesis of Brominated Alkanes via Heterogeneous Catalytic Distillation over $\text{Al}_2\text{O}_3/\text{SO}_4^{2-}/\text{ZrO}_2$

Su Yang, Xiaoxuan Guo, Xiaomei Pan, Liuyu Gu, Xueping Liu, Lijing Gao and Guomin Xiao \*

School of Chemistry and Chemical Engineering, Southeast University, Nanjing 211189, China; yangsu961012@126.com (S.Y.); xiaoxuanguo426@163.com (X.G.); panxiaomei@seu.edu.cn (X.P.); guliuyu1997@126.com (L.G.); liuxp678@163.com (X.L.); gaolj@seu.edu.cn (L.G.)

\* Correspondence: xiaogm426@gmail.com; Tel.: +86-25-52090612

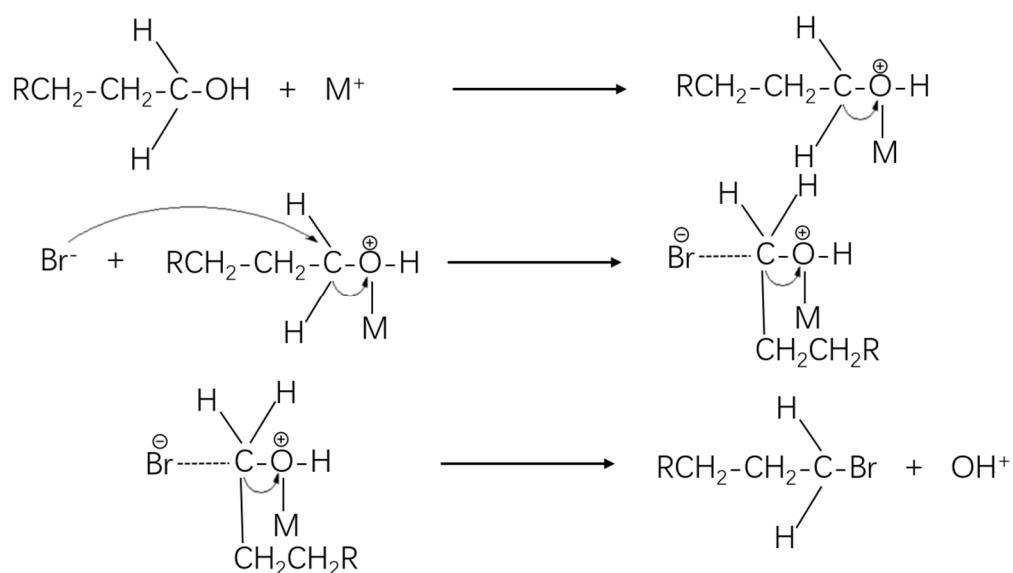

**Figure S1.**  $\text{SO}_4^{2-}/\text{M}_x\text{O}_y$  catalytic reaction mechanism

**Table S1.** TOF of the  $\text{Al}_2\text{O}_3/\text{SO}_4^{2-}/\text{ZrO}_2$  catalyst and comparison with other catalysts.

| Catalyst                                                                    | T/°C   | TOF/h <sup>-1</sup> | Yield/% | Ref.      |
|-----------------------------------------------------------------------------|--------|---------------------|---------|-----------|
| $\text{H}_3\text{PW}_{12}\text{O}_{40}\text{-}[\text{bmim}][\text{FeCl}_4]$ | 135    | 12.5                | 83      | [1]       |
| $\text{SO}_4^{2-}/\text{ZrO}_2\text{-ZnO}$                                  | 130    | 1.79                | 70.22   | [2]       |
| methyl trioctyl ammonium chloride                                           | 110    | 0.83                | 72.8    | [3]       |
| $\text{H}_2\text{SO}_4$                                                     | 70-130 | 4.17                | 93.2    | [4]       |
| $\text{Al}_2\text{O}_3/\text{SO}_4^{2-}/\text{ZrO}_2$                       | 110    | 13.33               | 96.1    | This work |

**Table S2.** Conversion substrate application of the  $\text{Al}_2\text{O}_3/\text{SO}_4^{2-}/\text{ZrO}_2$  catalyst

| Substrate   | T/°C | Time/h | Yield/% |
|-------------|------|--------|---------|
| Ethanol     | 90   | 3      | 93.72   |
| N-propanol  | 110  | 3      | 96.18   |
| Isopropanol | 110  | 3      | 95.55   |
| N-butanol   | 120  | 4      | 92.26   |

**References:**

1. Iraj, M. B.; Majid, M.; Shahram, T.  $\text{H}_3\text{PW}_{12}\text{O}_{40}$ -[bmim][FeCl<sub>4</sub>]: A novel and green catalyst-medium system for microwave-promoted selective interconversion of alkoxymethyl ethers into their corresponding nitriles, bromides and iodides. *C. R. Chim.* **2010**, *13*, 1468-1473.
2. Hu, G. Q.; Tan, L. Y.; Cui, L. M. Synthesis of 1-Bromooctane Catalyzed by Solid Super Acids  $\text{SO}_4^{2-}/\text{ZrO}_2$ -ZnO. *Asian. J. Chem.* **2014**, *26*, 1212-1214.
3. Loupy, A.; Pardo, C. A Convenient and Efficient Method for the Conversion of Alkyl Chlorides to the Corresponding Bromides. *Synth Commun.* **1988**, *18*, 1275-1281.
4. Kamm, O.; Marvel, C. S. Preparation of Alkyl and Alkylene bromides. *J Am Chem Soc.* **1920**, *42*, 299-309.
